# Supplementary material for: Optimal Extraction of Gallic Acid fromSuaeda glaucaBge. Leaves and Enhanced Efficiency by Ionic Liquids
Source: Hindawi journal article supplement (doi:10.1155/2016/5217802), 2016-01-01
Supplement: f1 [file 5217802.f1.docx]

**Supplementary material**


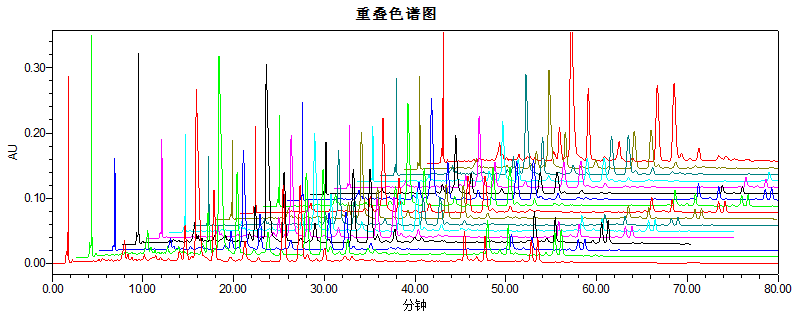


**Figure S1** HPLC diagrams of 17 experimentals.


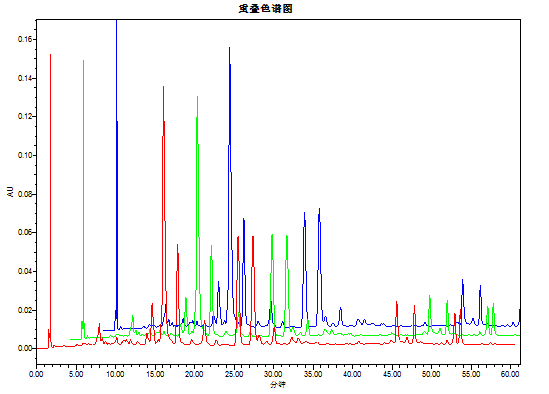


**Figure S2** HPLC diagrams of verification experimentals.


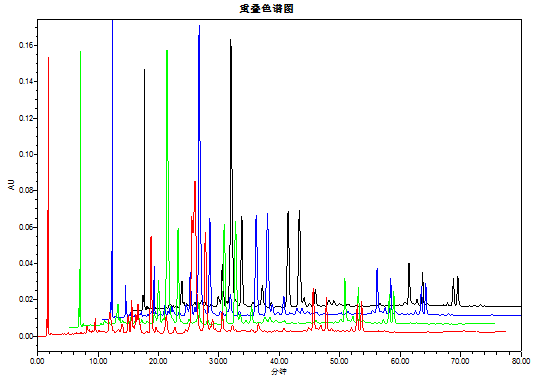


**Figure S3** HPLC diagrams of enhanced experimentals by ionic liquids.
